# Supplementary material for: Coding a coordination-driven self-assembly via a hydrogen bond-directed solid-state synthesis: An unexpected chiral tetrahedral capsule
Source: Royal Society of Chemistry journal article supplement (doi:10.1039/b700748e), 2007-01-01

# Coding a coordination-driven self-assembly *via* a hydrogen-bond-directed solid-state synthesis: An unexpected chiral tetrahedral capsule.

Tamara D. Hamilton, Dejan-Krešimir Bučar, and Leonard R. MacGillivray\*

Department of Chemistry, University of Iowa, Iowa City, IA 52242-1294 (USA)

## SUPPLEMENTARY MATERIAL

**Figure S1.** UV-Vis data: (a) titration of  $\text{Cu}(\text{NO}_3)_2 \cdot 2.5\text{H}_2\text{O}$  in MeCN with 2,3'-tpcb and (b) mole-ratio plot.

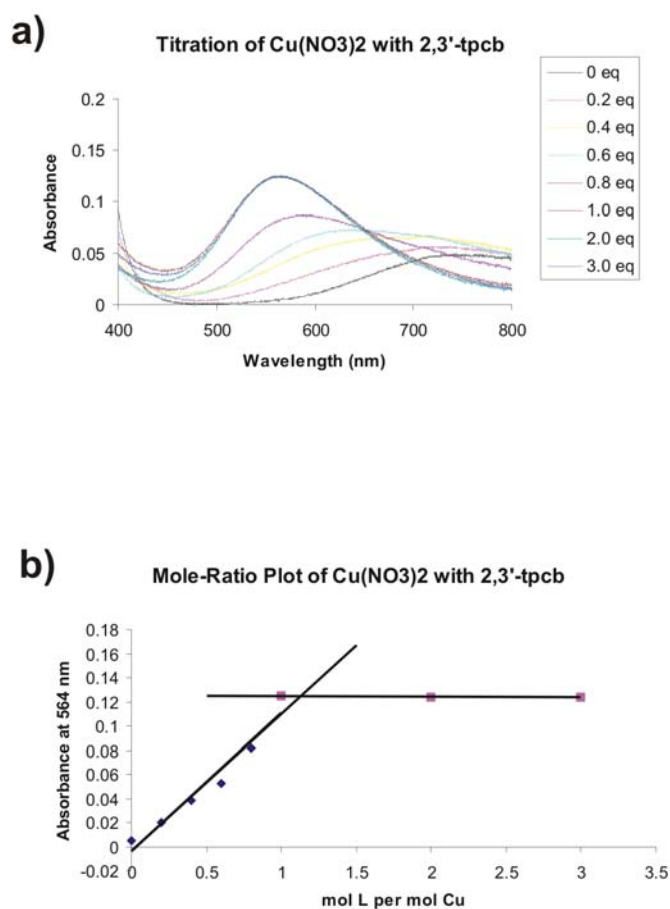

Supplement: b700748e.pdf [file b700748e.pdf]
